# Supplementary material for: Bidirectional Nitrogen Transfer and Plant Growth in a Mixed Plantation of N2-Fixing Species and Eucalyptus urophylla × E. grandis under Different N Applications
Source: MDPI journal article supplement (doi:10.3390/f12091171), 2021-08-30
Supplement: s1 [file s1]

**Table S1.** The N concentration of *Eucalyptus* and *D. odorifera* under different N application rate and planting system at 90, 135 and 180 days.

| Species                              | N Level        | Intercropping |       |       |       |       |       |        |       |       | Monoculture |       |       |       |       |       |        |       |       |
|--------------------------------------|----------------|---------------|-------|-------|-------|-------|-------|--------|-------|-------|-------------|-------|-------|-------|-------|-------|--------|-------|-------|
|                                      |                | Roots         |       |       | Stems |       |       | Leaves |       |       | Roots       |       |       | Stems |       |       | Leaves |       |       |
|                                      |                | 90 d          | 135 d | 180 d | 90 d  | 135 d | 180 d | 90 d   | 135 d | 180 d | 90 d        | 135 d | 180 d | 90 d  | 135 d | 180 d | 90 d   | 135 d | 180 d |
| <i>E. urophylla</i> × <i>grandis</i> | CK             | 3.45          | 2.35  | 3.08  | 2.31  | 1.61  | 2.09  | 8.90   | 5.49  | 5.86  | 2.93        | 1.51  | 2.56  | 2.16  | 1.32  | 2.63  | 8.30   | 4.17  | 4.51  |
|                                      | N <sub>1</sub> | 4.83          | 2.53  | 3.03  | 3.87  | 2.06  | 2.42  | 12.99  | 5.61  | 5.77  | 3.93        | 1.84  | 2.82  | 3.00  | 1.67  | 3.07  | 10.25  | 5.17  | 4.80  |
|                                      | N <sub>2</sub> | 5.30          | 2.78  | 2.82  | 5.22  | 2.55  | 1.94  | 16.69  | 7.68  | 5.57  | 4.26        | 2.39  | 3.33  | 3.60  | 2.31  | 3.29  | 14.04  | 6.33  | 4.92  |
|                                      | N <sub>3</sub> | 8.09          | 4.49  | 5.15  | 5.94  | 3.40  | 4.02  | 20.77  | 12.65 | 6.26  | 6.03        | 3.30  | 4.54  | 5.08  | 2.81  | 2.04  | 16.01  | 9.97  | 7.48  |
| <i>D. odorifera</i>                  | CK             | 6.38          | 8.70  | 9.41  | 7.33  | 6.45  | 12.86 | 21.67  | 18.24 | 16.15 | 8.10        | 7.32  | 9.63  | 5.67  | 4.74  | 10.74 | 12.24  | 9.48  | 16.06 |
|                                      | N <sub>1</sub> | 8.69          | 11.24 | 10.15 | 8.82  | 7.94  | 12.49 | 20.64  | 19.29 | 15.63 | 9.24        | 8.47  | 10.17 | 5.59  | 5.30  | 12.93 | 13.74  | 10.90 | 15.11 |
|                                      | N <sub>2</sub> | 10.18         | 9.68  | 9.13  | 8.74  | 8.22  | 10.08 | 25.77  | 20.73 | 13.39 | 10.69       | 11.43 | 9.62  | 7.28  | 6.88  | 10.93 | 17.95  | 18.58 | 15.71 |
|                                      | N <sub>3</sub> | 12.01         | 9.71  | 8.78  | 9.35  | 9.63  | 12.29 | 26.77  | 19.66 | 16.01 | 12.44       | 10.04 | 9.12  | 12.30 | 8.72  | 12.68 | 25.76  | 15.54 | 15.87 |

**Table S2.** The *F* statistic and *P* values for Nitrogen levels (N), time (T) and planting systems (P-S) ANOVA effects on dry matter yield of *Eucalypts urophylla* × *grandis* and *D. odorifera*.

| Source of variation                  | N        |          | T        |          | P-S      |          | N × T    |          | T × P-S  |          | N × P-S  |          | N × P-S × T |          |
|--------------------------------------|----------|----------|----------|----------|----------|----------|----------|----------|----------|----------|----------|----------|-------------|----------|
|                                      | <i>F</i> | <i>P</i> | <i>F</i>    | <i>P</i> |
| <i>E. urophylla</i> × <i>grandis</i> | 3529.33  | < 0.001  | 8788.71  | < 0.001  | 1036.57  | < 0.001  | 394.61   | < 0.001  | 237.65   | < 0.001  | 21.68    | < 0.001  | 6.64        | < 0.001  |
| <i>D. odorifera</i>                  | 818.89   | < 0.001  | 6214.65  | < 0.001  | 1038.04  | < 0.001  | 50.59    | < 0.001  | 78.74    | < 0.001  | 55.66    | < 0.001  | 27.25       | < 0.001  |

**Table S3.** The *F* statistic and *P* values for Nitrogen levels (N), time (T) and planting systems (P-S) ANOVA effects on N content of *Eucalypts urophylla* × *grandis* and *D. odorifera*.

| Source<br>of variation | N        |          | T        |          | P-S      |          | N × T    |          | T × P-S  |          | N × P-S  |          | N × P-S × T |          |
|------------------------|----------|----------|----------|----------|----------|----------|----------|----------|----------|----------|----------|----------|-------------|----------|
|                        | <i>F</i> | <i>P</i> | <i>F</i>    | <i>P</i> |
| <i>E. urophylla</i> ×  |          |          |          |          |          |          |          |          |          |          |          |          |             |          |
| <i>grandis</i>         | 2897.37  | < 0.001  | 443.93   | < 0.001  | 663.56   | < 0.001  | 29.06    | < 0.001  | 9.69     | < 0.001  | 48.17    | < 0.001  | 4.88        | < 0.001  |
| <i>D. odorifera</i>    | 1125.79  | < 0.001  | 282.55   | < 0.001  | 55.08    | < 0.001  | 7.68     | < 0.001  | 3.54     | 0.034    | 4.88     | 0.004    | 1.92        | 0.089    |

**Table S4.** Mean of atom %  $^{15}\text{N}$  (standard error) in plants compartments of *D. odorifera* and *Eucalyptus* before  $^{15}\text{N}$  labeling ( $^{15}\text{N}$  abundance values).

| Species             | N level        | Roots         | Stems         | Leaves        |
|---------------------|----------------|---------------|---------------|---------------|
| <i>Eucalyptus</i>   | CK             | 0.364 (0.012) | 0.357 (0.009) | 0.393 (0.010) |
|                     | N <sub>1</sub> | 0.362 (0.019) | 0.353 (0.012) | 0.388 (0.005) |
|                     | N <sub>2</sub> | 0.357 (0.010) | 0.350 (0.011) | 0.385 (0.011) |
|                     | N <sub>3</sub> | 0.355 (0.013) | 0.348 (0.014) | 0.386 (0.015) |
| <i>D. odorifera</i> | CK             | 0.345 (0.009) | 0.352 (0.012) | 0.360 (0.012) |
|                     | N <sub>1</sub> | 0.344 (0.012) | 0.353 (0.010) | 0.360 (0.010) |
|                     | N <sub>2</sub> | 0.344 (0.007) | 0.349 (0.007) | 0.353 (0.011) |
|                     | N <sub>3</sub> | 0.338 (0.012) | 0.346 (0.014) | 0.354 (0.010) |

Note: All the  $^{15}\text{N}$  abundance values were measured on June 1<sup>st</sup>, 2017, which was occurred before labeling and after N application.

**Table S5.** The *F* statistic and *P* values for Nitrogen levels (N) and time (T) ANOVA effects on N transfer.

| Source of variation                           | N        |          | T        |          | N × T    |          |
|-----------------------------------------------|----------|----------|----------|----------|----------|----------|
|                                               | <i>F</i> | <i>P</i> | <i>F</i> | <i>P</i> | <i>F</i> | <i>P</i> |
| <i>E. urophylla</i> × <i>grandis</i> as donor | 207.70   | < 0.001  | 22.83    | < 0.001  | 9.99     | < 0.001  |
| <i>D. Odorifera</i> as donor                  | 79.27    | < 0.001  | 48.47    | < 0.001  | 6.68     | < 0.001  |

**Table S6.** The *F* statistic and *P* values for nitrogen levels (N), time (T) and planting systems (P-S) ANOVA effects on soil TN, NH<sub>4</sub><sup>+</sup>-N and NO<sub>3</sub><sup>-</sup>-N concentration under the pot conditions.

| Source of variation             | N        |          | T        |          | P-S      |          | N × T    |          | T × P-S  |          | N × P-S  |          | N × P-S × T |          |
|---------------------------------|----------|----------|----------|----------|----------|----------|----------|----------|----------|----------|----------|----------|-------------|----------|
|                                 | <i>F</i> | <i>P</i> | <i>F</i>    | <i>P</i> |
| TN                              | 31.63    | < 0.001  | 17.57    | < 0.001  | 19.70    | < 0.001  | 0.19     | 0.98     | 0.46     | 0.767    | 1.29     | 0.266    | 0.30        | 0.988    |
| NH <sub>4</sub> <sup>+</sup> -N | 85.04    | < 0.001  | 22.73    | < 0.001  | 735.09   | < 0.001  | 1.52     | 0.179    | 3.18     | 0.016    | 8.47     | < 0.001  | 1.59        | 0.104    |
| NO <sub>3</sub> <sup>-</sup> -N | 247.27   | < 0.001  | 25.35    | < 0.001  | 146.03   | < 0.001  | 12.43    | < 0.001  | 2.48     | 0.048    | 95.12    | < 0.001  | 1.56        | 0.115    |

**Table S7.** The *F* statistic and *P* values for Nitrogen levels (N) and planting system (P-S) ANOVA effects on dry matter yield under field conditions.

| Source of variation                  | Dry matter yield |          |          |          |          |          | N content |          |          |          |          |          |
|--------------------------------------|------------------|----------|----------|----------|----------|----------|-----------|----------|----------|----------|----------|----------|
|                                      | N                |          | P-S      |          | N × P-S  |          | N         |          | P-S      |          | N × P-S  |          |
|                                      | <i>F</i>         | <i>P</i> | <i>F</i> | <i>P</i> | <i>F</i> | <i>P</i> | <i>F</i>  | <i>P</i> | <i>F</i> | <i>P</i> | <i>F</i> | <i>P</i> |
| <i>E. urophylla</i> × <i>grandis</i> | 24.80            | < 0.001  | 18.51    | < 0.001  | 0.41     | 0.749    | 84.80     | < 0.001  | 20.039   | < 0.001  | 0.054    | 0.983    |
| <i>D. odorifera</i>                  | 9.02             | 0.006    | 37.65    | < 0.001  | 0.99     | 0.414    | 13.137    | 0.001    | 74.415   | < 0.001  | 2.377    | 0.095    |

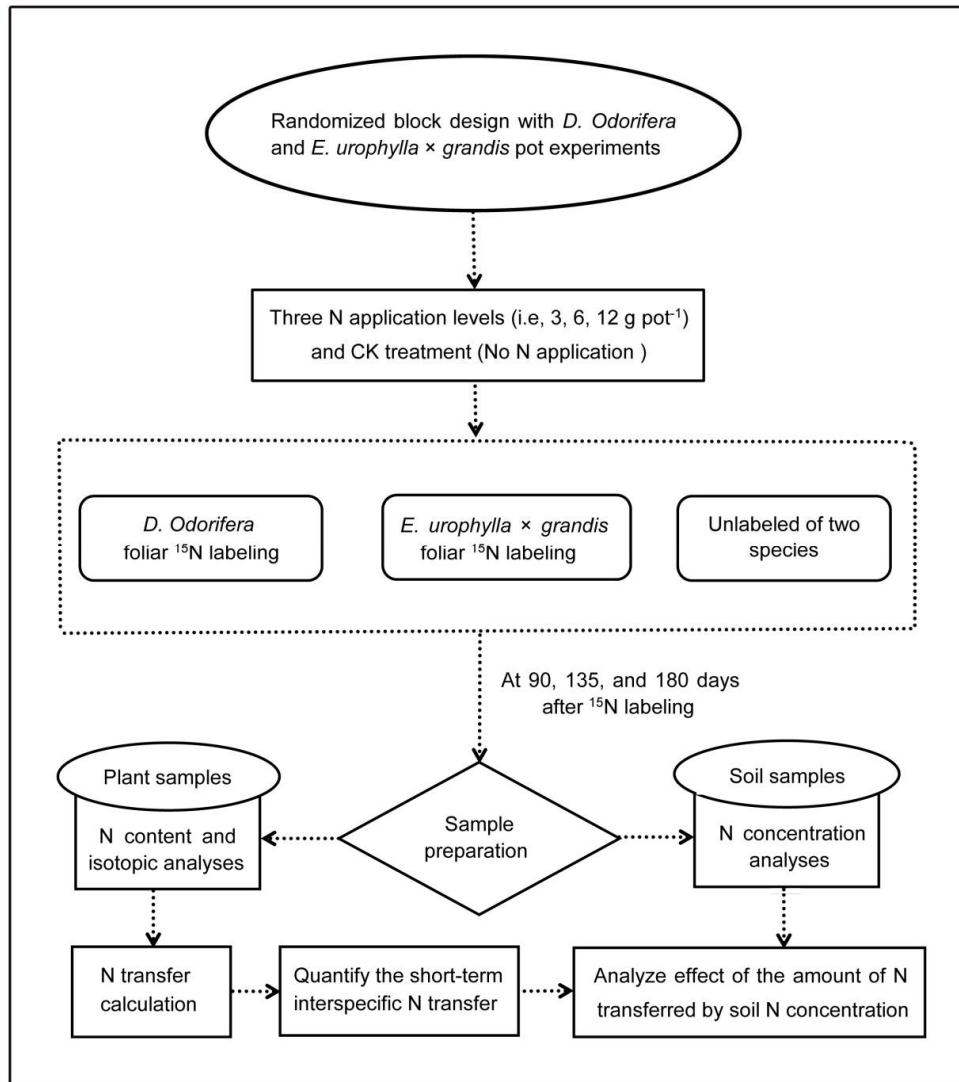

**Figure S1.** Flow diagram of  $^{15}\text{N}$ -labeled experiment.
